# Supplementary material for: Two novel mixed Eu3+/Y3+ Ln MOFs: influence of pH on the topology, Eu/Y ratio and energy transfer
Source: Royal Society of Chemistry journal article supplement (doi:10.1039/c4ce00513a), 2014-01-01
Supplement: c4ce00513a1.pdf [file c4ce00513a1.pdf]

## Hydrothermal synthesis, crystal structures and photoluminescence properties of two mixed $\text{Eu}^{3+}$ and $\text{Y}^{3+}$ lanthanide metal-organic framework materials

Yu Zhang, Weiwei Ju, Xiao Xu, Yun Lv, Dunru Zhu, Yan Xu\*

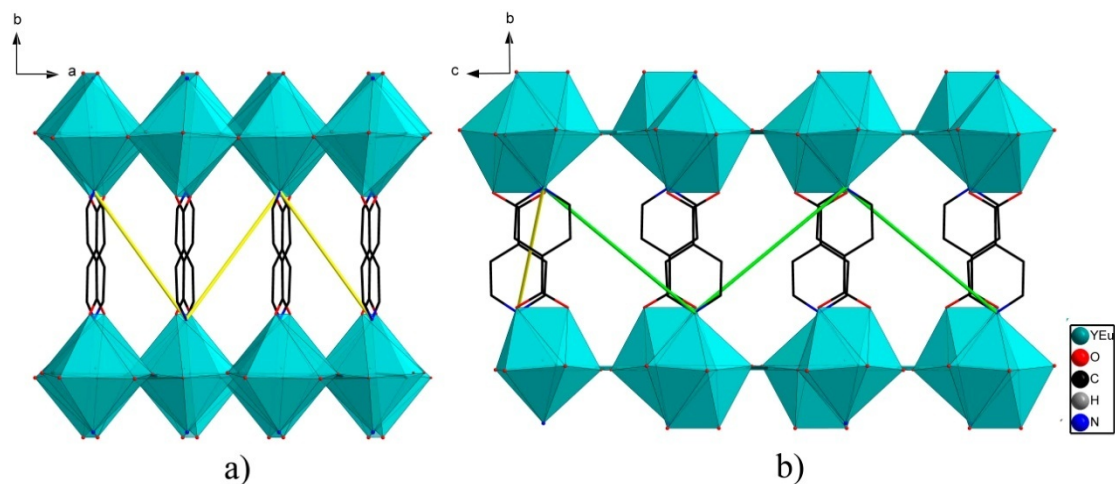

**Fig. S1** a) View of the 3D structure of **2** along the c axis; Yellow line: the zigzag distribution of N atoms. b) View of the 3D structure of **2** along the a axis; Green line: the zigzag distribution of N atoms

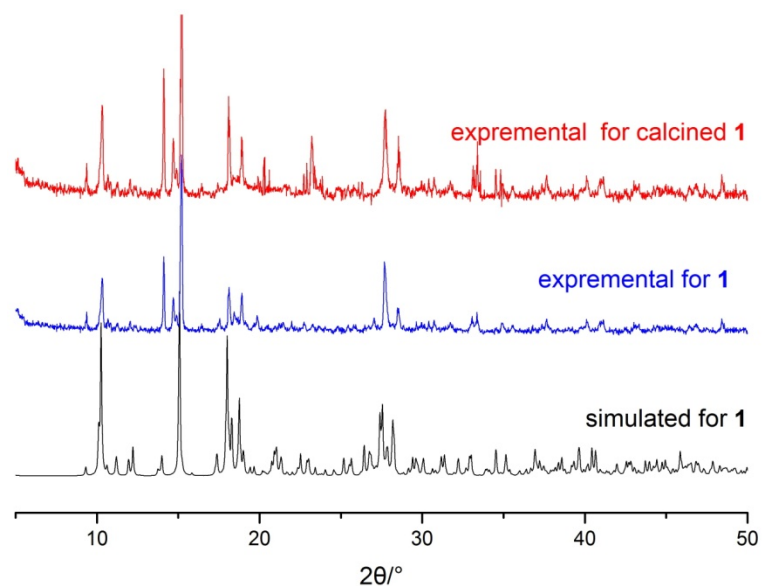

**Fig. S2** The simulated and experimental powder X-ray diffraction patterns for compound **1** and **1** calcined at 200°C for 2 hours.

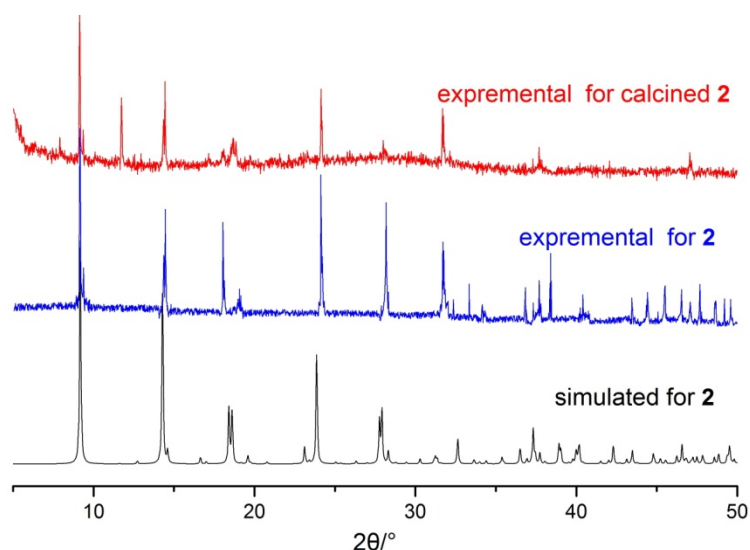

**Fig. S3** The simulated and experimental powder X-ray diffraction patterns for compound **2** and **2** calcined at 200°C for 2 hours.

**Table. S1** EDX quantitative results for Eu/Y ratio of **1**

| <i>Element</i> | <i>Weight %</i> | <i>Atom %</i> | <i>Formula</i> | <i>Compnd %</i> | <i>Norm.</i>   |
|----------------|-----------------|---------------|----------------|-----------------|----------------|
| <i>Line</i>    |                 |               |                |                 | <i>Compnd%</i> |
| <i>YL</i>      | 50.90           | 63.93         | Y              | 50.90           | 50.90          |
| <i>Eu L</i>    | 49.10           | 36.07         | Eu             | 49.10           | 49.10          |
| <b>Total</b>   | 100.00          | 100.00        |                | 100.00          | 100.00         |

**Table. S2** EDX quantitative results for Eu/Y ratio of **2**

| <i>Element</i> | <i>Weight %</i> | <i>Atom %</i> | <i>Formula</i> | <i>Compnd %</i> | <i>Norm.</i>   |
|----------------|-----------------|---------------|----------------|-----------------|----------------|
| <i>Line</i>    |                 |               |                |                 | <i>Compnd%</i> |
| <i>YL</i>      | 41.13           | 54.43         | Y              | 41.13           | 41.13          |
| <i>Eu L</i>    | 58.87           | 45.57         | Eu             | 58.87           | 58.87          |
| <b>Total</b>   | 100.00          | 100.00        |                | 100.00          | 100.00         |

**Table. S3** Selected bonds distances (Å) and bond angles for **1**

|               |          |             |          |
|---------------|----------|-------------|----------|
| Eu(1)-O(1)#1  | 2.272(3) | Eu(3)-O(18) | 2.362(3) |
| Eu(1)-O(16)#1 | 2.302(3) | Eu(3)-O(6W) | 2.370(3) |
| Eu(1)-O(10)   | 2.368(3) | Eu(3)-O(3W) | 2.388(3) |
| Eu(1)-O(11)   | 2.398(3) | Eu(3)-O(9)  | 2.392(3) |

|                      |            |                      |            |
|----------------------|------------|----------------------|------------|
| Eu(1)-O(5W)          | 2.411(3)   | Eu(3)-O(17)#4        | 2.430(3)   |
| Eu(1)-O(5)           | 2.428(3)   | Eu(3)-O(12)          | 2.455(3)   |
| Eu(1)-O(2W)          | 2.431(3)   | O(1)-Y(1)#5          | 2.272(3)   |
| Eu(1)-O(7)           | 2.458(3)   | O(1)-Eu(1)#5         | 2.272(3)   |
| Eu(2)-O(3)           | 2.278(3)   | O(4)-Y(2)#2          | 2.297(3)   |
| Eu(2)-O(4)#2         | 2.297(3)   | O(4)-Eu(2)#2         | 2.297(3)   |
| Eu(2)-O(6)           | 2.381(3)   | O(16)-Y(1)#5         | 2.302(3)   |
| Eu(2)-O(20)          | 2.398(3)   | O(16)-Eu(1)#5        | 2.302(3)   |
| Eu(2)-O(4W)          | 2.406(3)   | O(17)-Y(3)#4         | 2.430(3)   |
| Eu(2)-O(1W)          | 2.422(3)   | O(17)-Eu(3)#4        | 2.430(3)   |
| Eu(2)-O(19)#3        | 2.428(3)   | O(19)-Y(2)#3         | 2.428(3)   |
| Eu(3)-O(2)           | 2.298(3)   | O(19)-Eu(2)#3        | 2.428(3)   |
| Eu(3)-O(15)          | 2.316(3)   |                      |            |
| <hr/>                |            |                      |            |
| O(1)#1-Eu(1)-O(16)#1 | 103.71(13) | O(4W)-Eu(2)-O(1W)    | 130.51(11) |
| O(1)#1-Eu(1)-O(10)   | 140.72(11) | O(3)-Eu(2)-O(19)#3   | 143.35(10) |
| O(16)#1-Eu(1)-O(10)  | 78.82(11)  | O(4)#2-Eu(2)-O(19)#3 | 76.11(12)  |
| O(1)#1-Eu(1)-O(11)   | 151.54(11) | O(6)-Eu(2)-O(19)#3   | 80.65(10)  |
| O(16)#1-Eu(1)-O(11)  | 79.87(12)  | O(20)-Eu(2)-O(19)#3  | 67.16(9)   |
| O(10)-Eu(1)-O(11)    | 67.71(10)  | O(4W)-Eu(2)-O(19)#3  | 70.92(10)  |
| O(1)#1-Eu(1)-O(5W)   | 70.85(12)  | O(1W)-Eu(2)-O(19)#3  | 136.49(9)  |
| O(16)#1-Eu(1)-O(5W)  | 78.71(12)  | O(3)-Eu(2)-O(8)      | 82.53(11)  |
| O(10)-Eu(1)-O(5W)    | 71.34(11)  | O(4)#2-Eu(2)-O(8)    | 138.13(10) |
| O(11)-Eu(1)-O(5W)    | 136.58(11) | O(6)-Eu(2)-O(8)      | 66.59(10)  |
| O(1)#1-Eu(1)-O(5)    | 87.61(12)  | O(20)-Eu(2)-O(8)     | 73.57(10)  |
| O(16)#1-Eu(1)-O(5)   | 139.71(11) | O(4W)-Eu(2)-O(8)     | 140.20(10) |
| O(10)-Eu(1)-O(5)     | 116.08(10) | O(1W)-Eu(2)-O(8)     | 70.04(10)  |
| O(11)-Eu(1)-O(5)     | 73.20(10)  | O(19)#3-Eu(2)-O(8)   | 120.80(11) |
| O(5W)-Eu(1)-O(5)     | 140.63(11) | O(2)-Eu(3)-O(15)     | 106.79(13) |
| O(1)#1-Eu(1)-O(2W)   | 77.48(11)  | O(2)-Eu(3)-O(18)     | 134.47(10) |
| O(16)#1-Eu(1)-O(2W)  | 73.41(10)  | O(15)-Eu(3)-O(18)    | 80.15(12)  |
| O(10)-Eu(1)-O(2W)    | 137.88(10) | O(2)-Eu(3)-O(6W)     | 148.79(11) |
| O(11)-Eu(1)-O(2W)    | 76.61(10)  | O(15)-Eu(3)-O(6W)    | 86.18(12)  |
| O(5W)-Eu(1)-O(2W)    | 130.86(10) | O(18)-Eu(3)-O(6W)    | 74.85(10)  |
| O(5)-Eu(1)-O(2W)     | 71.60(9)   | O(2)-Eu(3)-O(3W)     | 77.70(11)  |
| O(1)#1-Eu(1)-O(7)    | 81.76(11)  | O(15)-Eu(3)-O(3W)    | 75.30(12)  |
| O(16)#1-Eu(1)-O(7)   | 152.41(10) | O(18)-Eu(3)-O(3W)    | 144.66(11) |
| O(10)-Eu(1)-O(7)     | 80.23(10)  | O(6W)-Eu(3)-O(3W)    | 78.48(11)  |
| O(11)-Eu(1)-O(7)     | 108.33(10) | O(2)-Eu(3)-O(9)      | 78.25(12)  |
| O(5W)-Eu(1)-O(7)     | 77.69(11)  | O(15)-Eu(3)-O(9)     | 147.49(11) |
| O(5)-Eu(1)-O(7)      | 66.60(9)   | O(18)-Eu(3)-O(9)     | 74.58(11)  |
| O(2W)-Eu(1)-O(7)     | 133.72(10) | O(6W)-Eu(3)-O(9)     | 106.17(12) |
| O(3)-Eu(2)-O(4)#2    | 106.21(13) | O(3W)-Eu(3)-O(9)     | 136.00(11) |
| O(3)-Eu(2)-O(6)      | 84.67(12)  | O(2)-Eu(3)-O(17)#4   | 70.98(10)  |
| O(4)#2-Eu(2)-O(6)    | 153.09(11) | O(15)-Eu(3)-O(17)#4  | 72.78(11)  |

|                    |            |                     |            |
|--------------------|------------|---------------------|------------|
| O(3)-Eu(2)-O(20)   | 149.31(11) | O(18)-Eu(3)-O(17)#4 | 68.51(9)   |
| O(4)#2-Eu(2)-O(20) | 80.76(11)  | O(6W)-Eu(3)-O(17)#4 | 140.11(10) |
| O(6)-Eu(2)-O(20)   | 102.59(11) | O(3W)-Eu(3)-O(17)#4 | 125.52(10) |
| O(3)-Eu(2)-O(4W)   | 73.52(11)  | O(9)-Eu(3)-O(17)#4  | 79.08(10)  |
| O(4)#2-Eu(2)-O(4W) | 79.99(11)  | O(2)-Eu(3)-O(12)    | 76.04(10)  |
| O(6)-Eu(2)-O(4W)   | 79.73(11)  | O(15)-Eu(3)-O(12)   | 145.43(11) |
| O(20)-Eu(2)-O(4W)  | 136.90(10) | O(18)-Eu(3)-O(12)   | 123.21(10) |
| O(3)-Eu(2)-O(1W)   | 75.54(10)  | O(6W)-Eu(3)-O(12)   | 77.54(10)  |
| O(4)#2-Eu(2)-O(1W) | 72.79(11)  | O(3W)-Eu(3)-O(12)   | 71.70(10)  |
| O(6)-Eu(2)-O(1W)   | 134.13(10) | O(9)-Eu(3)-O(12)    | 67.03(10)  |
| O(20)-Eu(2)-O(1W)  | 78.35(10)  | O(17)#4-Eu(3)-O(12) | 136.57(10) |

Symmetry transformations used to generate equivalent atoms:

#1  $x+1, y, z$ ; #2  $-x-1, -y, -z$ ; #3  $-x-2, -y, -z$ ; #4  $-x-2, -y-1, -z-1$ ; #5  $x-1, y, z$

**Table. S4** Selected bonds distances (Å) for **2**

|                      |            |                      |           |
|----------------------|------------|----------------------|-----------|
| Eu(1)-O(1H)#1        | 2.236(2)   | Eu(1)-Eu(1)#1        | 3.9135(3) |
| Eu(1)-O(1H)          | 2.254(2)   | O(1)-Y(1)#5          | 2.410(2)  |
| Eu(1)-O(1)#2         | 2.410(2)   | O(1)-Eu(1)#5         | 2.410(2)  |
| Eu(1)-O(4)#3         | 2.425(2)   | O(2)-Y(1)#5          | 2.426(3)  |
| Eu(1)-O(2)#2         | 2.426(3)   | O(2)-Eu(1)#5         | 2.426(3)  |
| Eu(1)-O(3)           | 2.457(2)   | O(3)-Y(1)#1          | 2.461(2)  |
| Eu(1)-O(3)#4         | 2.461(2)   | O(3)-Eu(1)#1         | 2.461(2)  |
| Eu(1)-N(1)           | 2.575(3)   | O(4)-Y(1)#6          | 2.425(2)  |
| Eu(1)-Y(1)#1         | 3.9135(3)  | O(4)-Eu(1)#6         | 2.425(2)  |
| O(1H)#1-Eu(1)-O(1H)  | 145.37 (5) | O(2)#2-Eu(1)-O(3)    | 74.26(8)  |
| O(1H)#1-Eu(1)-O(1)#2 | 96.33(9)   | O(1H)#1-Eu(1)-O(3)#4 | 142.45(7) |
| O(1H)-Eu(1)-O(1)#2   | 111.57(9)  | O(1H)-Eu(1)-O(3)#4   | 66.43(7)  |
| O(1H)#1-Eu(1)-O(4)#3 | 76.80(7)   | O(1)#2-Eu(1)-O(3)#4  | 78.25(8)  |
| O(1H)-Eu(1)-O(4)#3   | 129.37(7)  | O(4)#3-Eu(1)-O(3)#4  | 65.93(6)  |
| O(1)#2-Eu(1)-O(4)#3  | 74.07(8)   | O(2)#2-Eu(1)-O(3)#4  | 110.01(8) |
| O(1H)#1-Eu(1)-O(2)#2 | 95.22(8)   | O(3)-Eu(1)-O(3)#4    | 145.74(5) |
| O(1H)-Eu(1)-O(2)#2   | 85.78(8)   | O(1H)#1-Eu(1)-N(1)   | 82.73(8)  |
| O(1)#2-Eu(1)-O(2)#2  | 53.83(9)   | O(1H)-Eu(1)-N(1)     | 80.93(8)  |
| O(4)#3-Eu(1)-O(2)#2  | 126.28(8)  | O(1)#2-Eu(1)-N(1)    | 153.61(9) |
| O(1H)#1-Eu(1)-O(3)   | 66.77(7)   | O(4)#3-Eu(1)-N(1)    | 80.09(8)  |
| O(1H)-Eu(1)-O(3)     | 80.39(7)   | O(2)#2-Eu(1)-N(1)    | 152.54(9) |
| O(1)#2-Eu(1)-O(3)    | 124.12(8)  | O(3)-Eu(1)-N(1)      | 79.87(8)  |
| O(4)#3-Eu(1)-O(3)    | 140.16(6)  | O(3)#4-Eu(1)-N(1)    | 86.49(7)  |

Symmetry transformations used to generate equivalent atoms:

#1  $x+1/2,-y+1/2,-z+1$ ; #2  $-x+1/2,y+1/2,z$ ; #3  $-x+1/2,-y+1/2,z-1/2$ ; #4  $x-1/2,-y+1/2,-z+1$ ; #5  $-x+1/2,y-1/2,z$ ; #6  $-x+1/2,-y+1/2,z+1/2$ ; #7  $-x+1,y,-z+3/2$

**Table. S5** Hydrogen bonds in the title compound **1**

| D—H...A         | d(D--H)/Å | d(H--A)/Å | d(D--A)/Å | ∠D—H...A/(°) |
|-----------------|-----------|-----------|-----------|--------------|
| O1W--H1WA...N1  | 0.83(3)   | 1.84(3)   | 2.666(5)  | 169(3)       |
| O1W--H1WB...O12 | 0.840(19) | 2.128(19) | 2.865(4)  | 146(3)       |
| O2W--H2WA...N2  | 0.85(2)   | 1.84(2)   | 2.680(5)  | 170(2)       |
| O2W--H2WB...O19 | 0.842(16) | 2.122(19) | 2.940(4)  | 164(4)       |
| O3W--H3WA...O8  | 0.83(3)   | 2.00(3)   | 2.794(4)  | 161(3)       |
| O3W--H3WB...O2W | 0.83(3)   | 2.10(3)   | 2.889(5)  | 161(3)       |
| O4W--H4WA...O5  | 0.85(3)   | 1.96(3)   | 2.801(4)  | 169(3)       |
| O4W--H4WB...O1W | 0.84(4)   | 2.14(4)   | 2.942(5)  | 160(3)       |
| O5W--H5WA...O7W | 0.84(3)   | 2.03(4)   | 2.670(9)  | 133(4)       |
| O5W--H5WB...O17 | 0.85(3)   | 2.05(4)   | 2.871(5)  | 163(4)       |
| O6W--H6WA...O7  | 0.83(3)   | 2.30(3)   | 3.116(4)  | 170(5)       |
| O6W--H6WB...N3  | 0.84(2)   | 1.91(3)   | 2.717(6)  | 161(4)       |
| O7W--H7WA...O9  | 0.881(16) | 2.373(16) | 2.888(9)  | 117.5(16)    |
| O7W--H7WB...O9  | 0.89(4)   | 2.39(3)   | 2.888(9)  | 116(2)       |
| O7W--H7WB...O18 | 0.89(4)   | 2.59(4)   | 3.350(11) | 144(5)       |
| C5--H5A...O11   | 0.93      | 2.58      | 3.349(5)  | 140.00       |

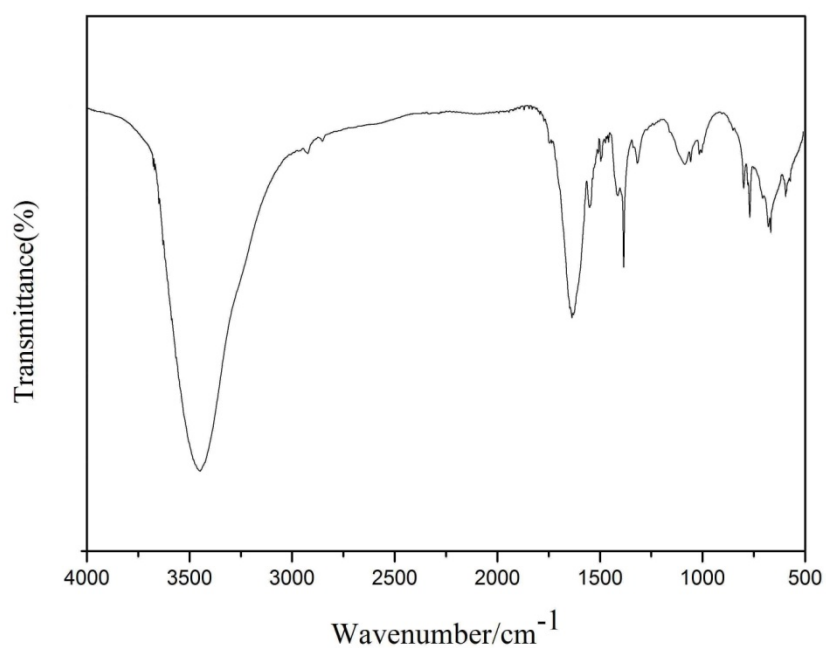

**Fig. S4** The IR spectra of compound **1**.

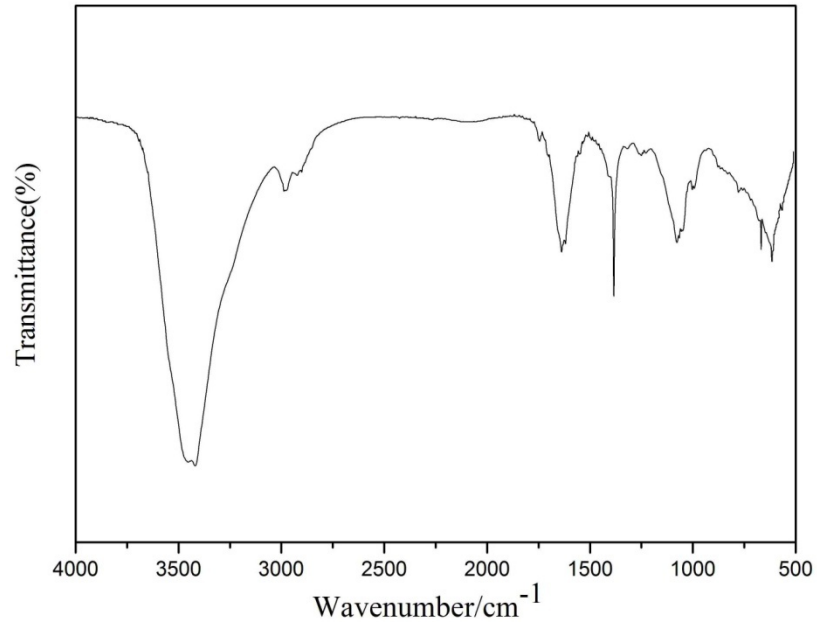

**Fig. S5** The IR spectra of compound **2**.

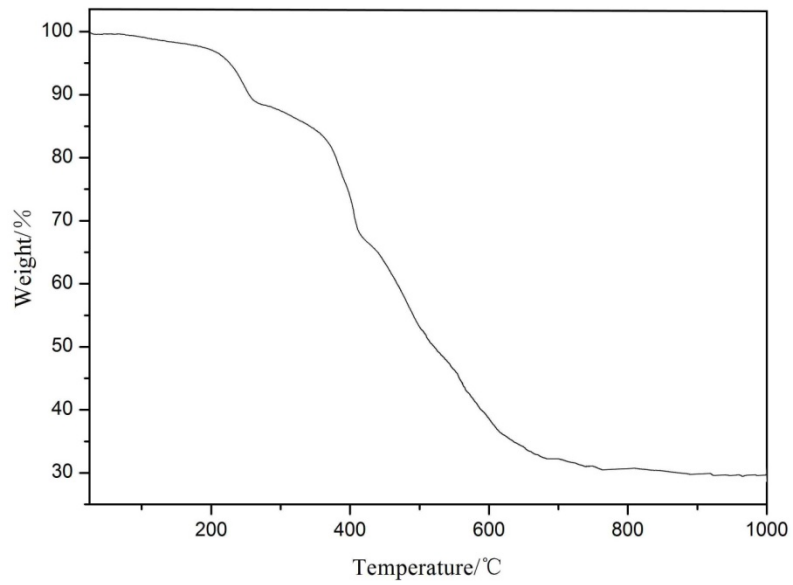

**Fig. S6** The TG curve of compound **1**.

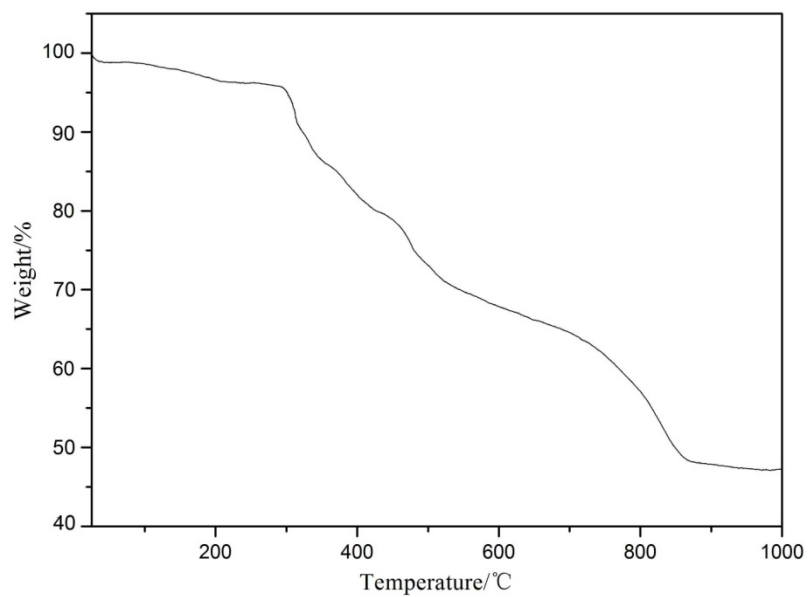

**Fig. S7** The TG curve of compound **2**.
